# Supplementary material
Source: MDPI journal article supplement (https://www.mdpi.com/2079-6412/11/10/1253)
Supplement: s1 [file s1]

# Oxygen Barrier Performance of Poly (Vinyl Alcohol) Coating Films with Different Induced Crystallinity and Model Predictions

Alamin Idris <sup>1,\*</sup>, Adrian Muntean <sup>2</sup>, Beko Mesic <sup>1,\*</sup>, Magnus Lestelius <sup>1</sup> and Asif Javed <sup>1</sup>

<sup>1</sup> Department of Engineering and Chemical Sciences, Karlstad University, SE 651 88 Karlstad, Sweden; magnus.lestelius@kau.se (M.L.); asif.javed@kau.se (A.J.)

<sup>2</sup> Department of Mathematics and Computer Sciences, Karlstad University, SE 651 88 Karlstad, Sweden; adrian.muntean@kau.se

\* Correspondence: alamin.abdulgadir@kau.se (A.I.); behudin.mesic@kau.se (B.M.)

## Table Of Contents

- **Figure S1.** Linear fit of the degree of crystallinity of PVOH coating films determined using FTIR absorbance spectra versus annealing temperatures.
- **Figure S2.** Linear plot of the degree of crystallinity of PVOH films determined using DSC thermogram versus annealing temperatures.
- **Figure S3.** Linear fit of the degree of crystallinity of PVOH coating films determined using XRD diffractogram versus annealing temperatures.
- **Table S1.** Thickness measurement of PVOH coating film and PET substrate.

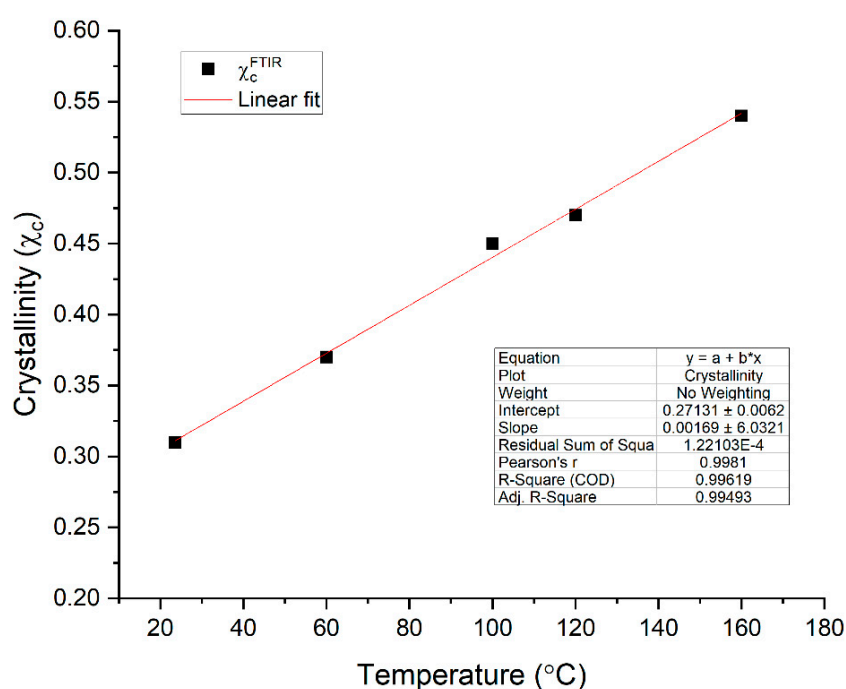

**Figure S1.** Linear fit of the degree of crystallinity of PVOH coating films determined using FTIR absorbance spectra versus annealing temperatures.

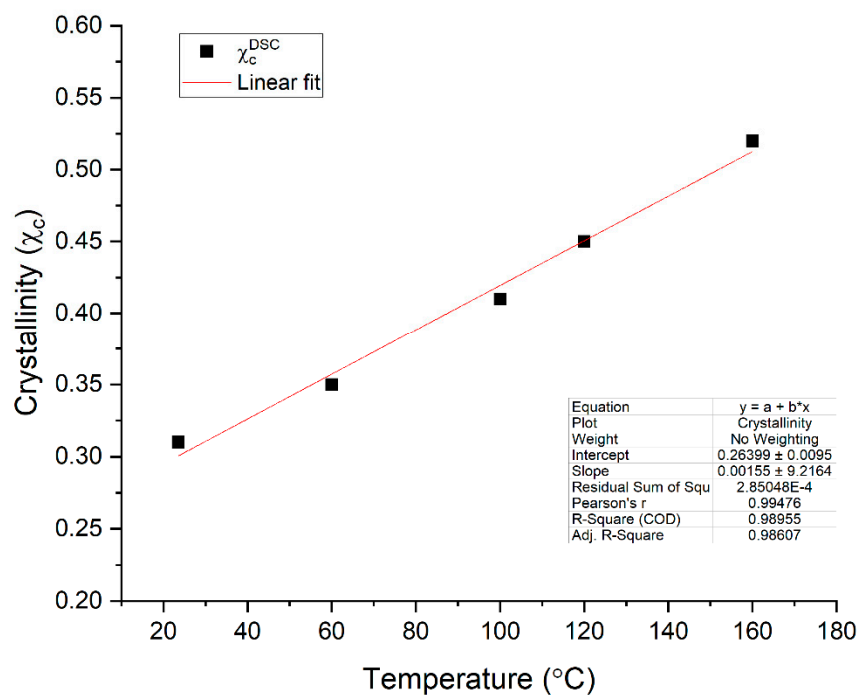

**Figure S2.** Linear plot of the degree of crystallinity of PVOH films determined using DSC thermogram versus annealing temperatures.

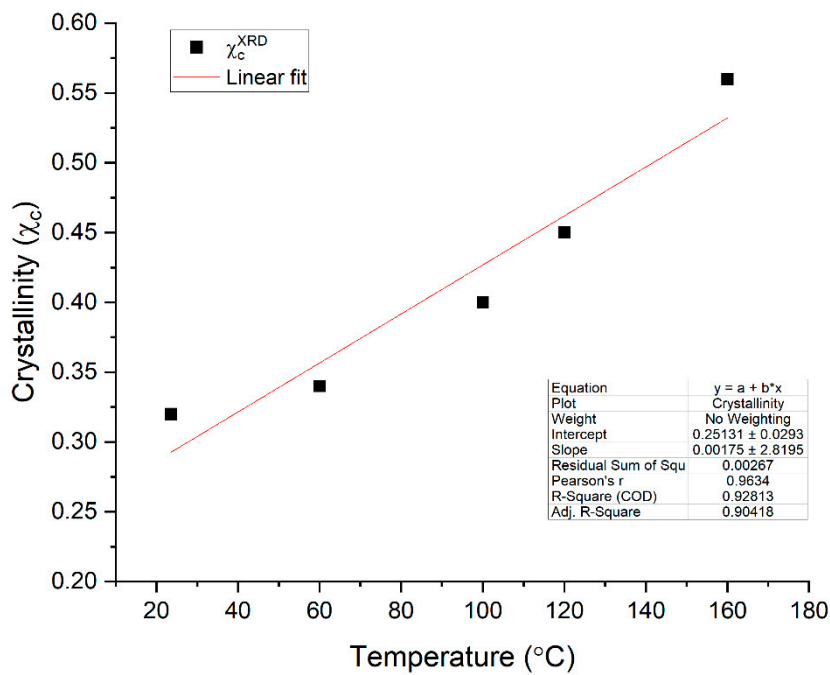

**Figure S3.** Linear fit of the degree of crystallinity of PVOH coating films determined using XRD diffractogram versus annealing temperatures.

**Table S1.** Thickness measurement of PVOH coating film and PET substrate.

| S. No. | Sample Names  | OTR (cc/[m <sup>2</sup> ·day]) |          |         | SD     |
|--------|---------------|--------------------------------|----------|---------|--------|
|        |               | 1                              | 2        | Average |        |
| 1      | PET substrate | 15.89577                       | 15.77931 | 15.8375 | 0.0824 |
| 2      | PVOH -RT      | 1.87694                        | 1.58036  | 1.7287  | 0.2097 |
| 3      | PVOH-60       | 1.41631                        | 1.25155  | 1.3339  | 0.1165 |
| 4      | PVOH-100      | 1.08052                        | 1.17448  | 1.1275  | 0.0664 |
| 5      | PVOH-120      | 0.89845                        | 0.71357  | 0.8060  | 0.1307 |
| 6      | PVOH-160      | 0.20939                        | 0.47136  | 0.3404  | 0.1852 |
